# Supplementary material
Source: ML conference proceedings conference paper supplement (https://openreview.net/forum?id=eTF3VDH2b6)

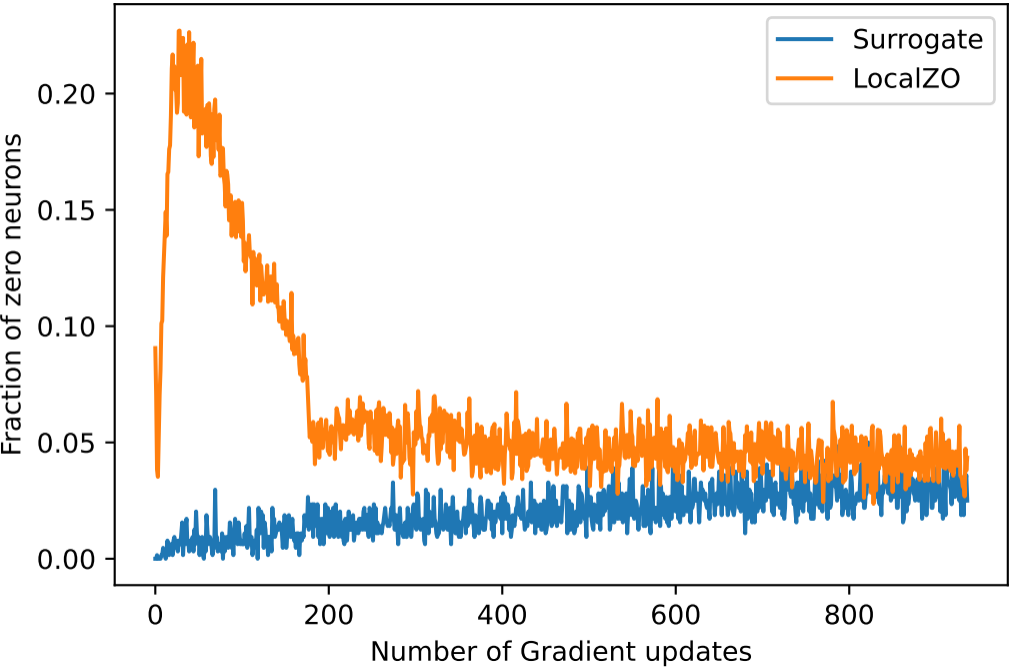

Supplement: supplementary_material [file attachment]

$$z \sim \text{Unif}([- \sqrt{3}, \sqrt{3}])$$

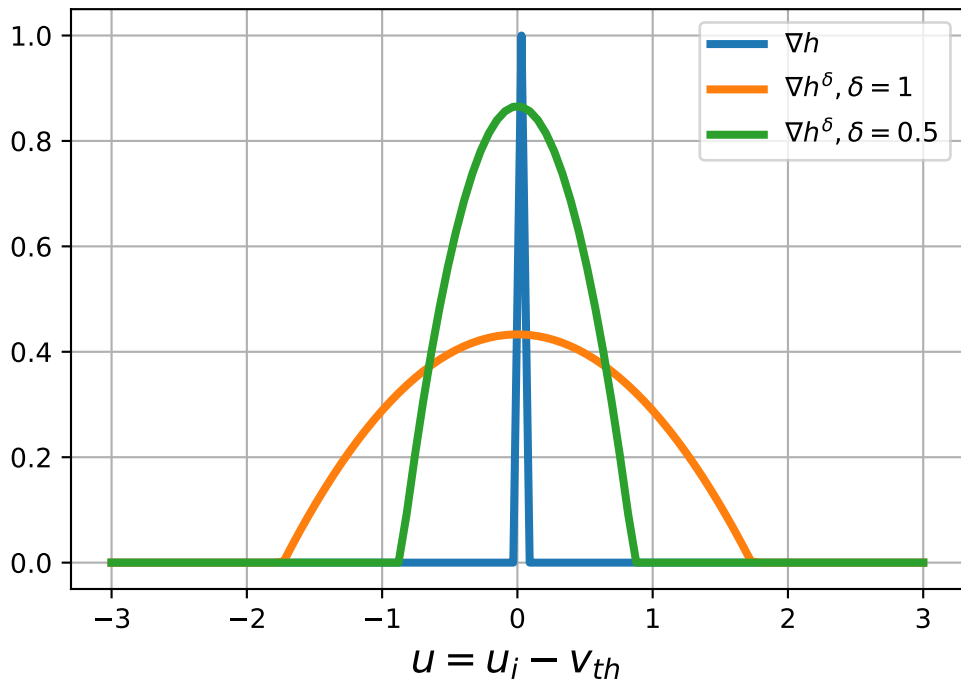

Supplement: supplementary_material [file attachment]

t=4

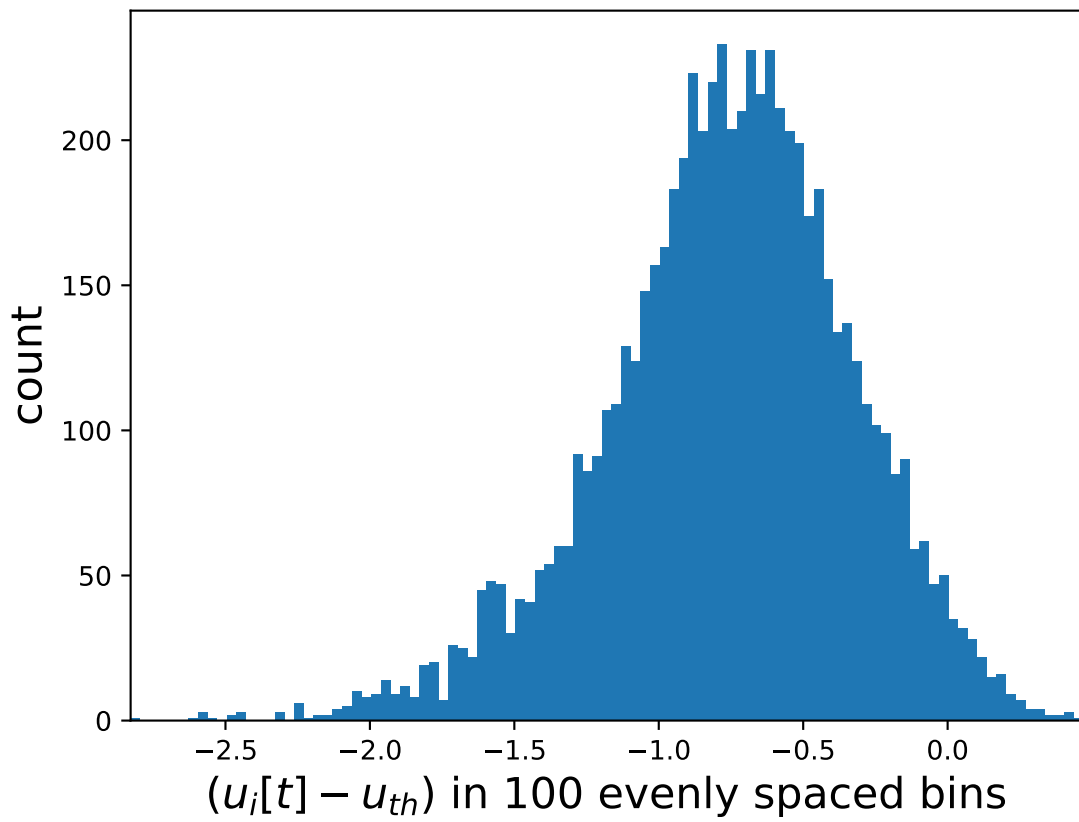

Supplement: supplementary_material [file attachment]

$z \sim \text{Unif}(\{-1, 1\})$

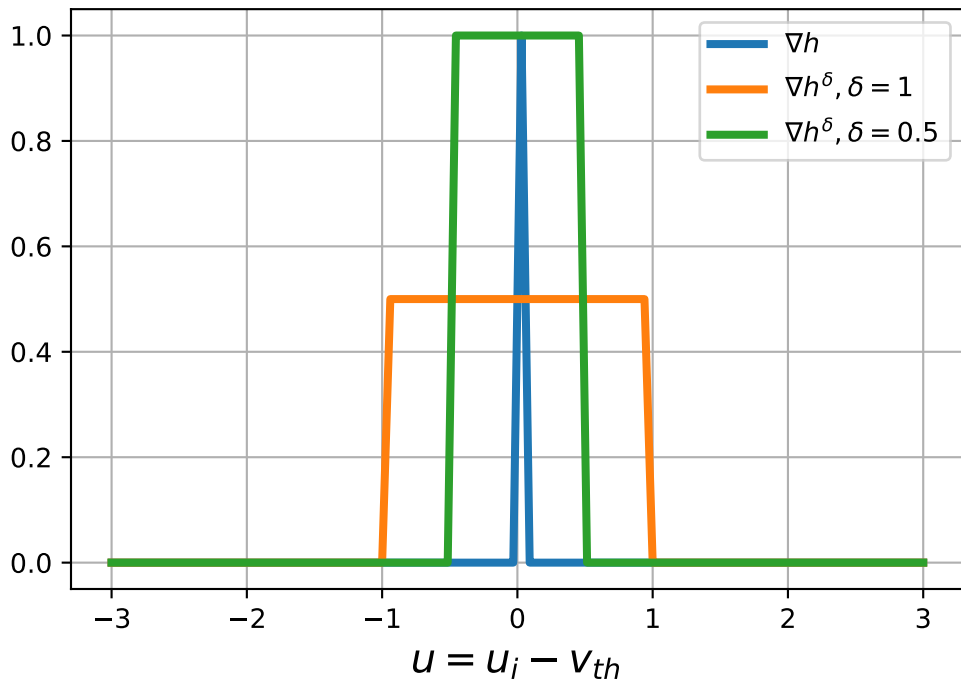

Supplement: supplementary_material [file attachment]

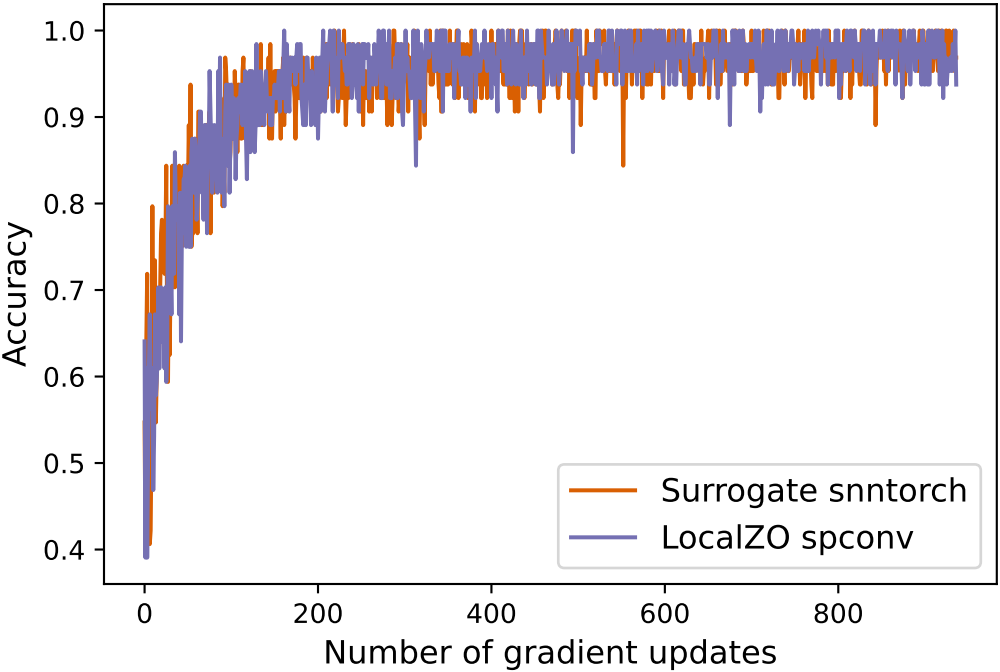

Supplement: supplementary_material [file attachment]

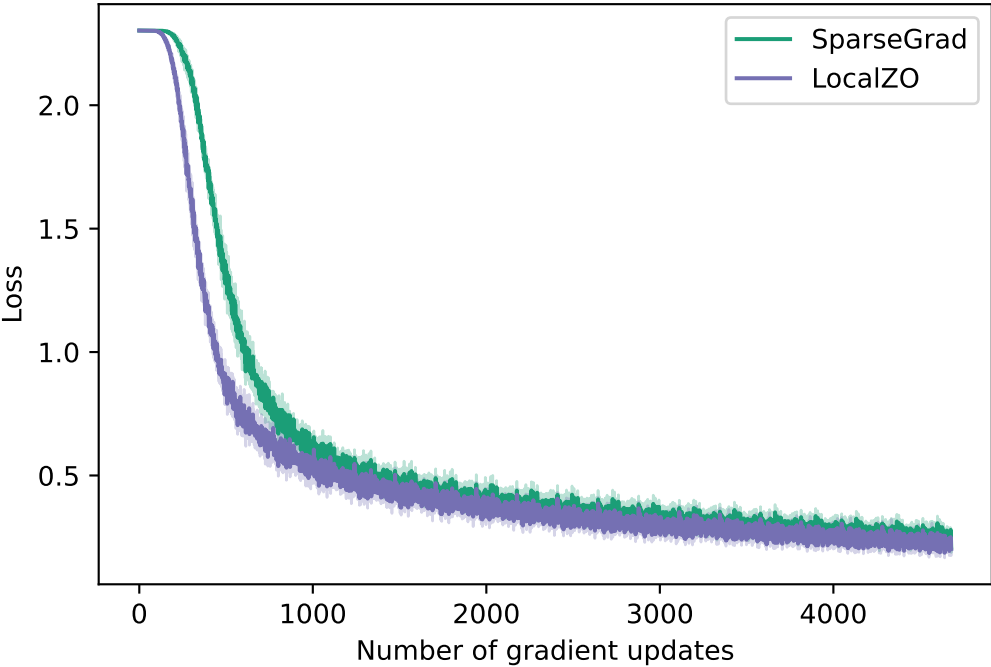

Supplement: supplementary_material [file attachment]

Spike,  $t=4$

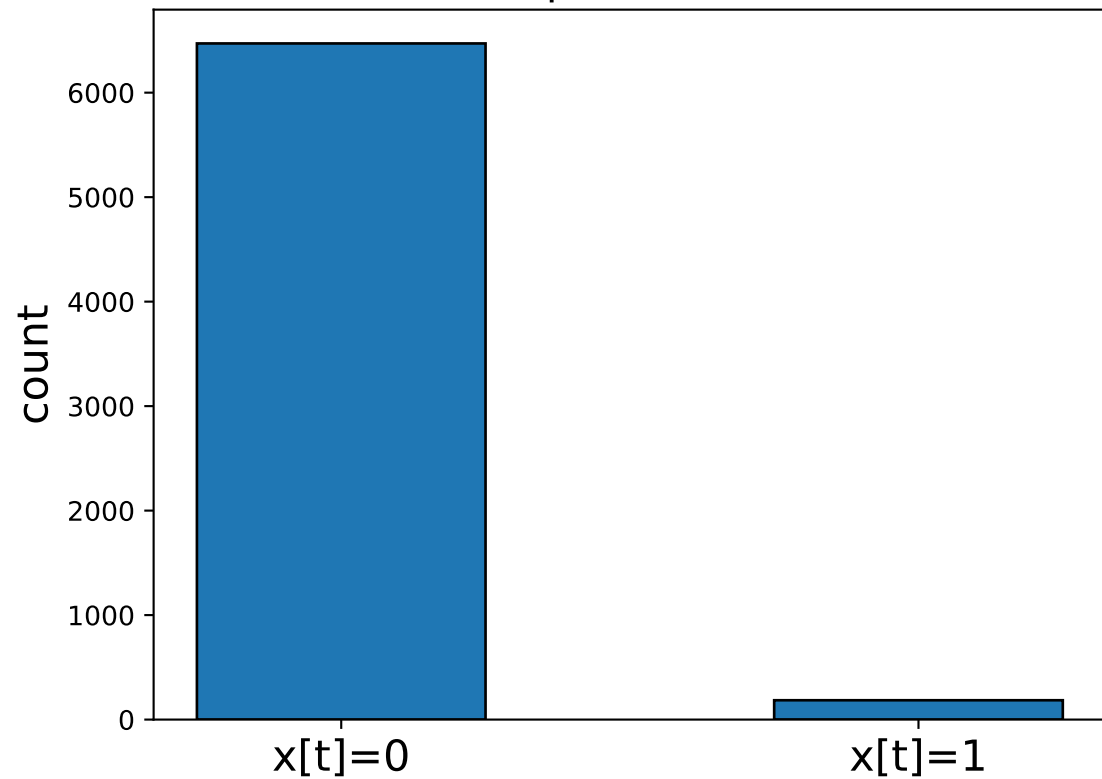

Supplement: supplementary_material [file attachment]

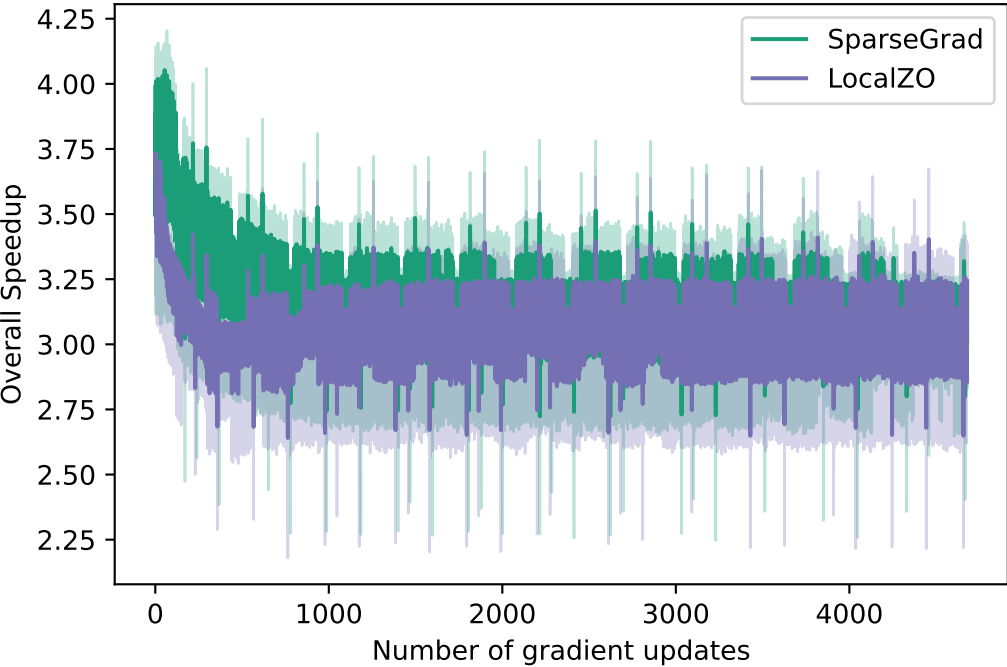

Supplement: supplementary_material [file attachment]

activity of a neuron,  $t=1$

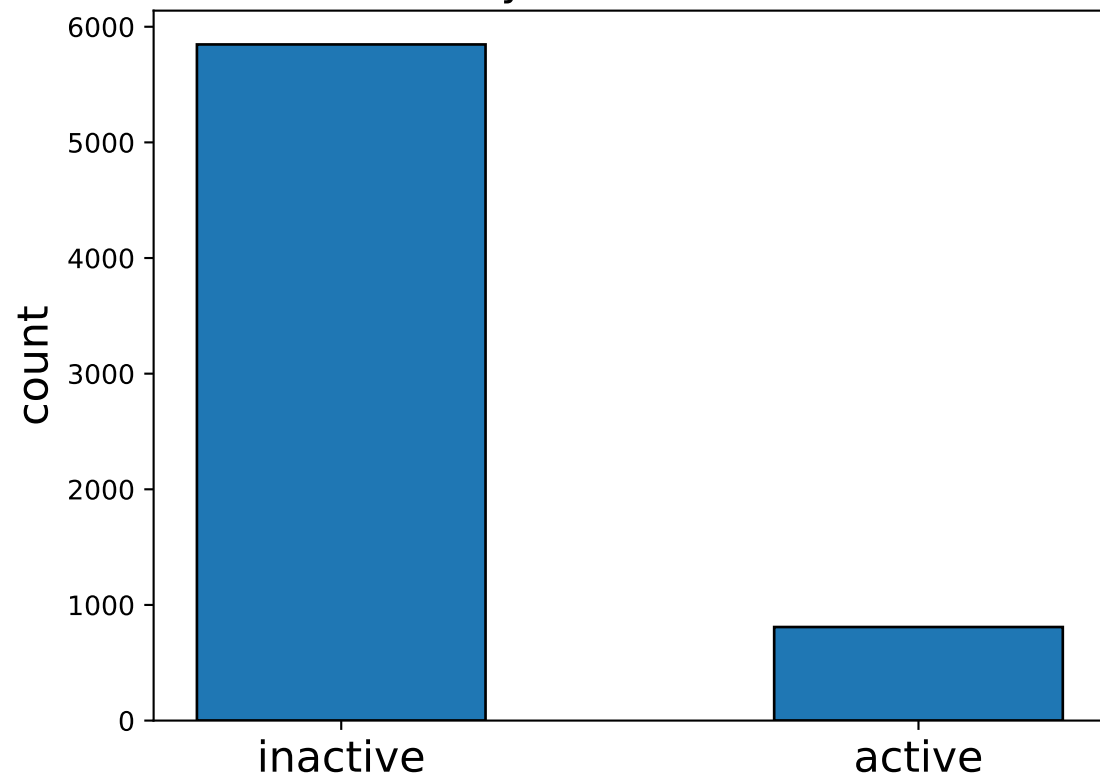

Supplement: supplementary_material [file attachment]

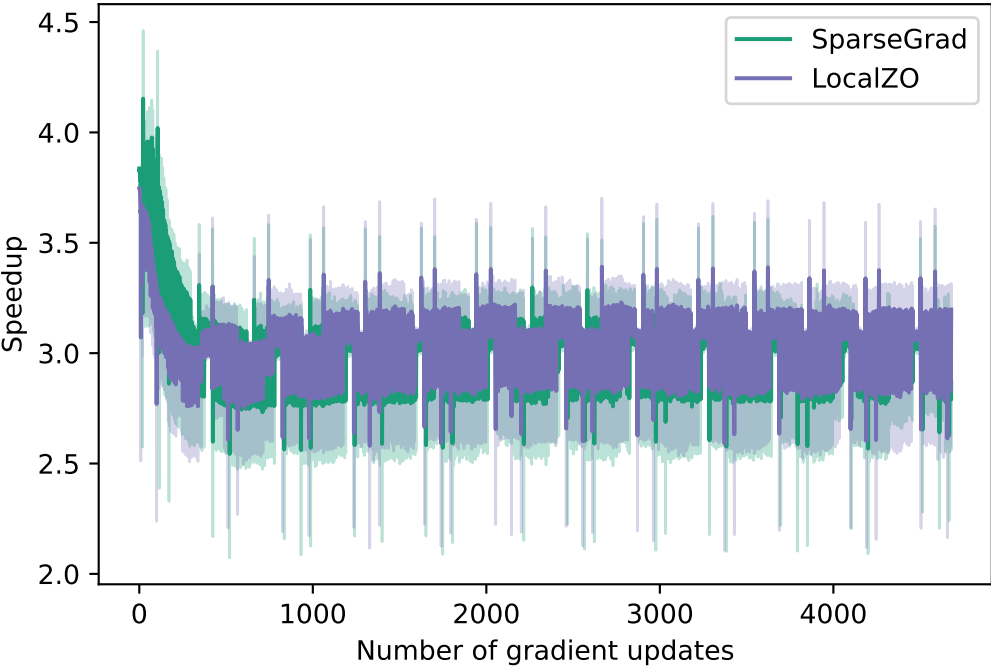

Supplement: supplementary_material [file attachment]

activity of a neuron,  $t=2$

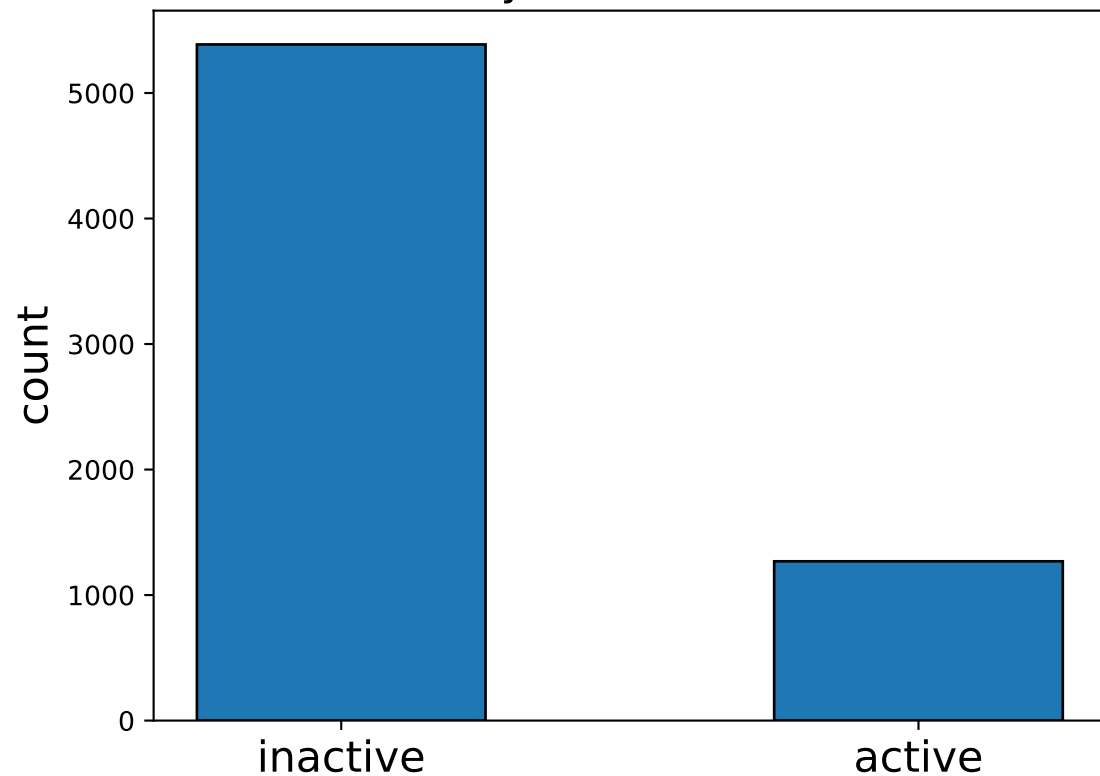

Supplement: supplementary_material [file attachment]

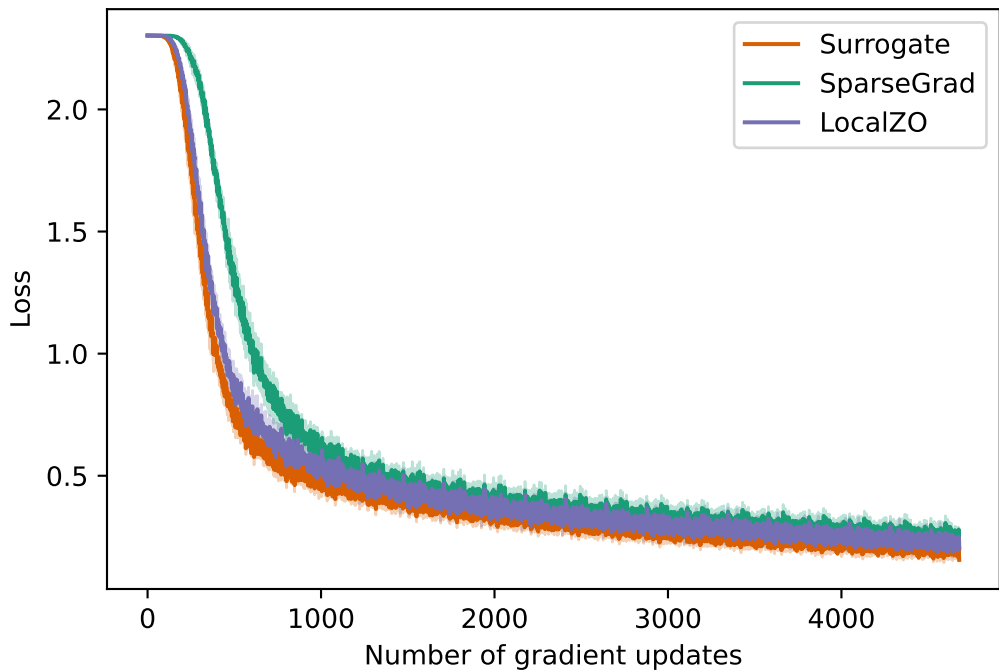

Supplement: supplementary_material [file attachment]

$$z \sim N(0, 1)$$

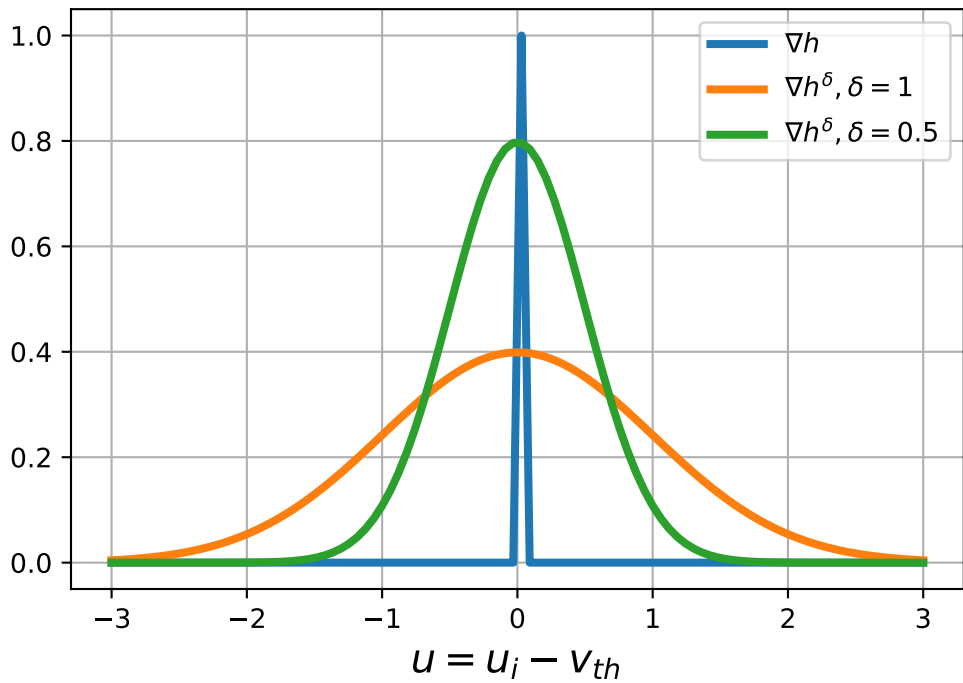

Supplement: supplementary_material [file attachment]

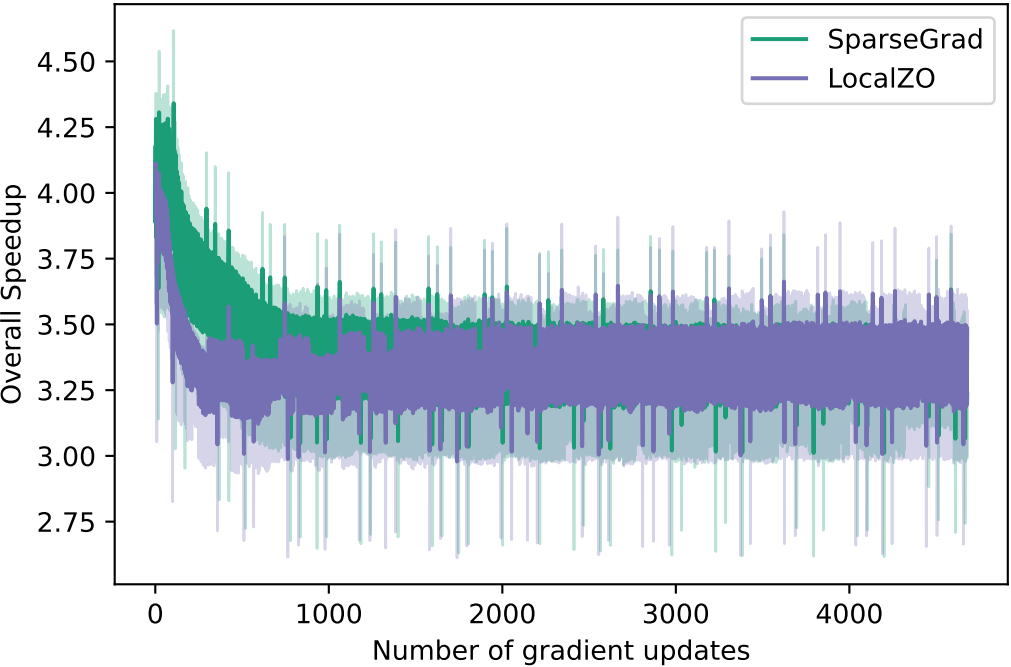

Supplement: supplementary_material [file attachment]

$$z \sim \text{Unif}([-\sqrt{3}, \sqrt{3}])$$

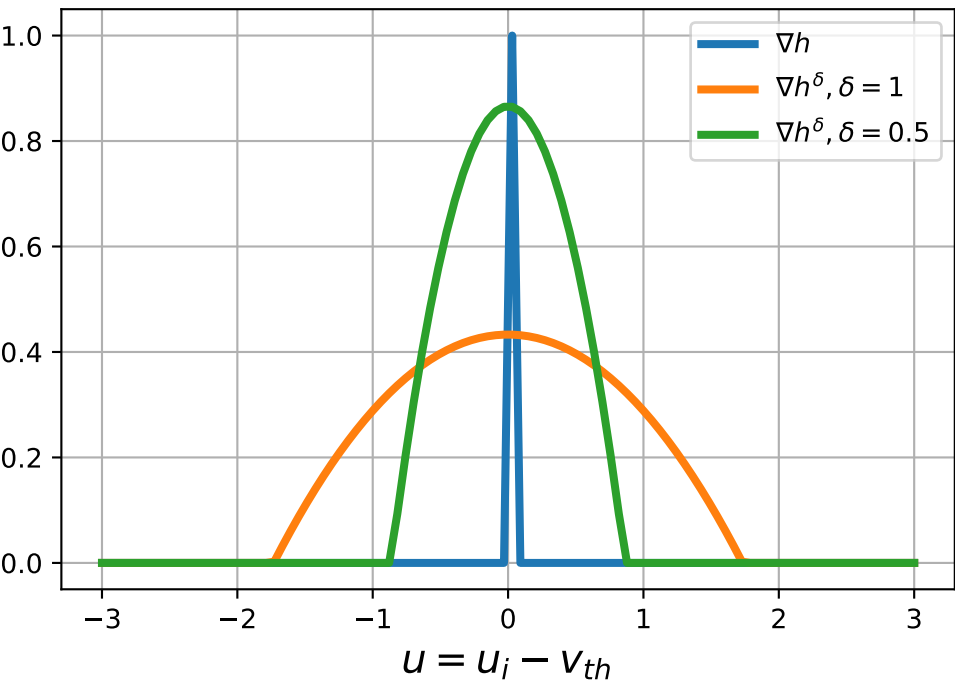

Supplement: supplementary_material [file attachment]

## Spike, $t=2$

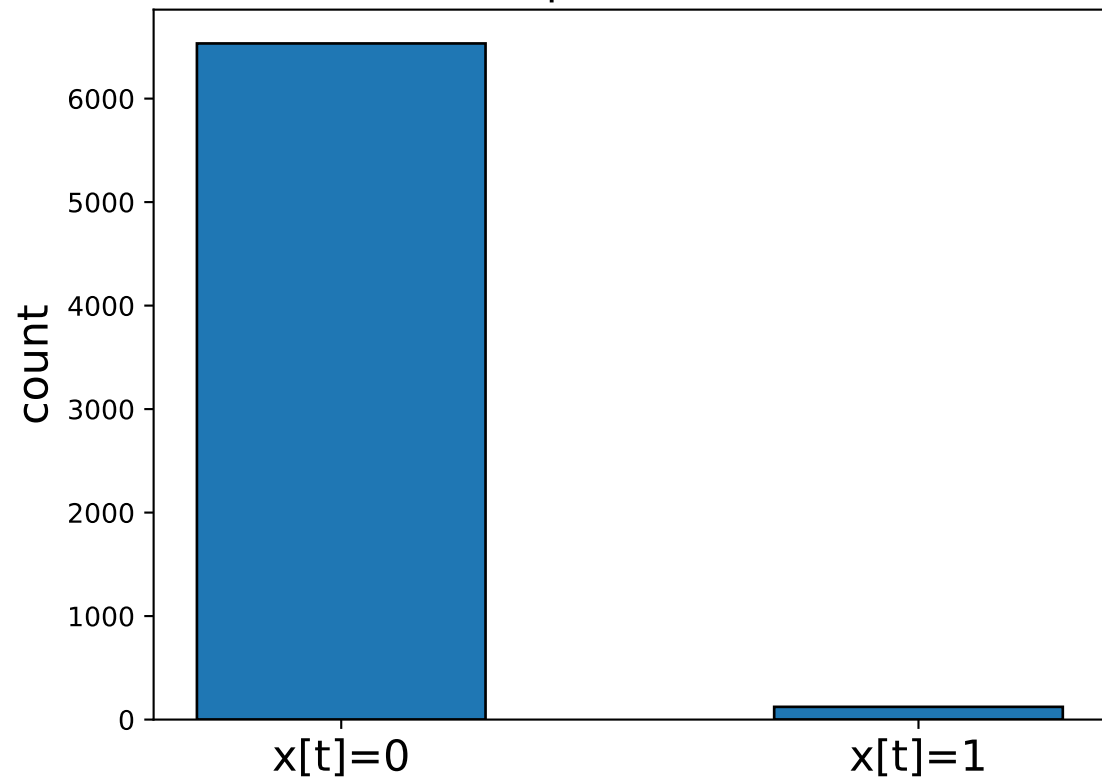

Supplement: supplementary_material [file attachment]

$t=1$

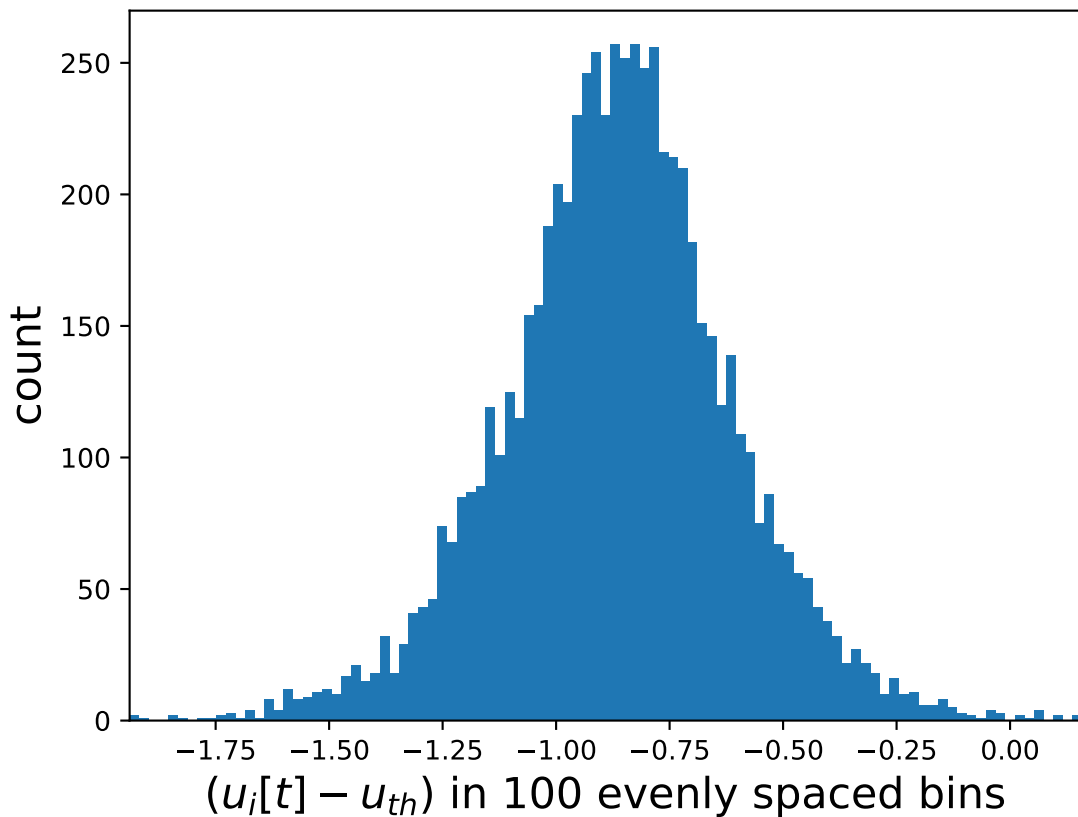

Supplement: supplementary_material [file attachment]

$z \sim \text{Unif}(\{-1, 1\})$

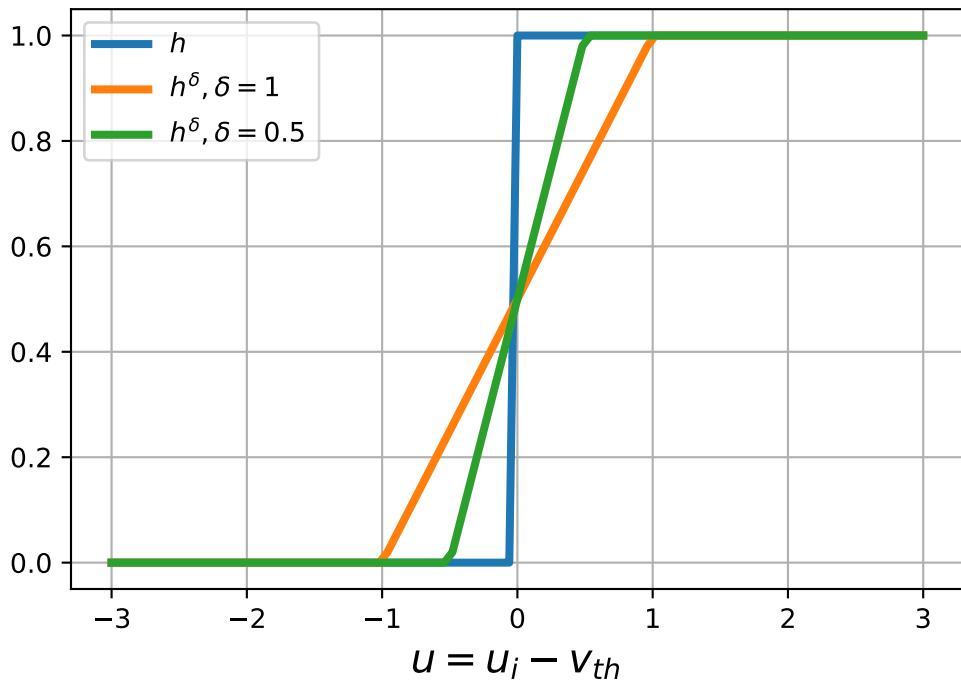

Supplement: supplementary_material [file attachment]

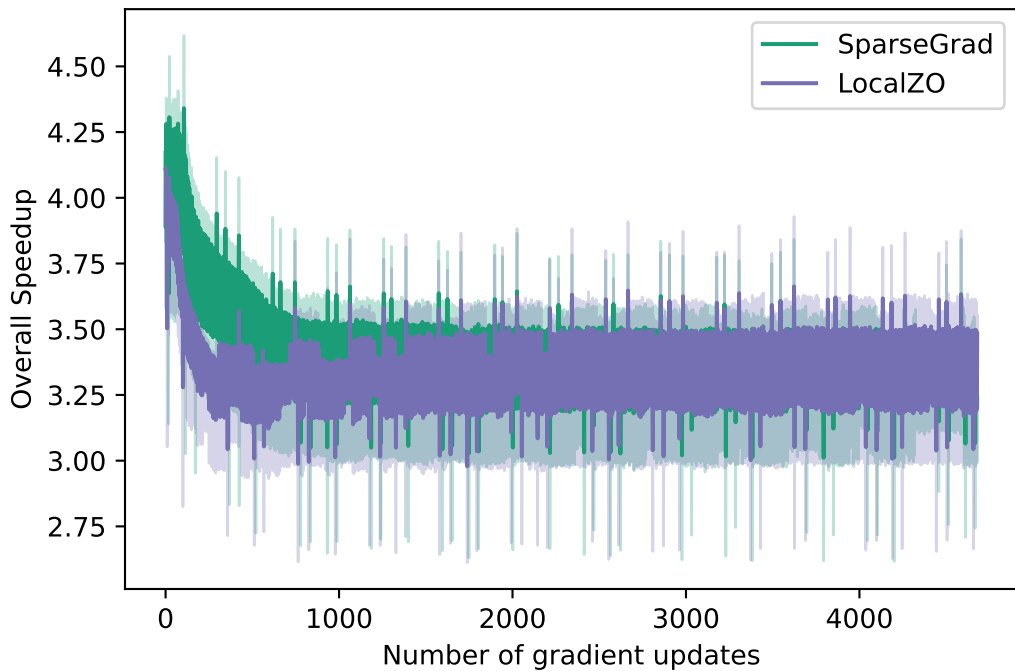

Supplement: supplementary_material [file attachment]

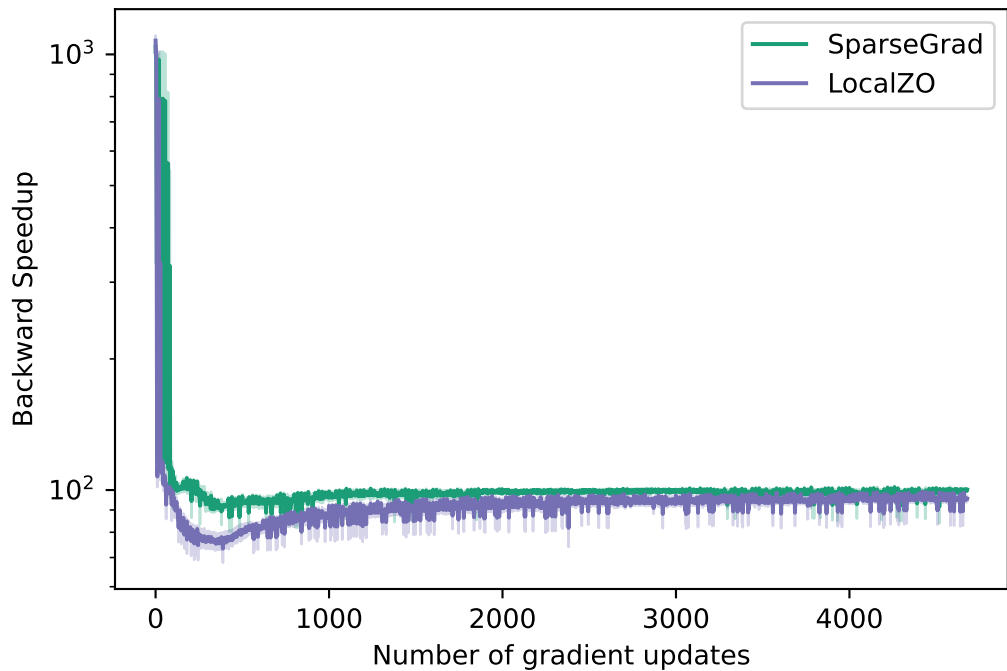

Supplement: supplementary_material [file attachment]

$z \sim N(0, 1)$

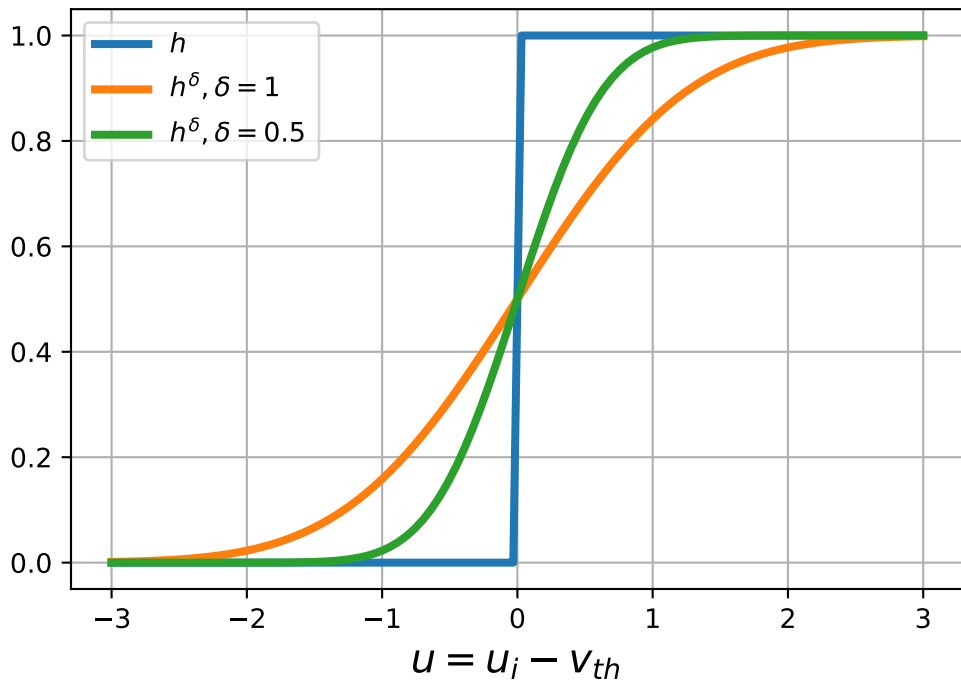

Supplement: supplementary_material [file attachment]

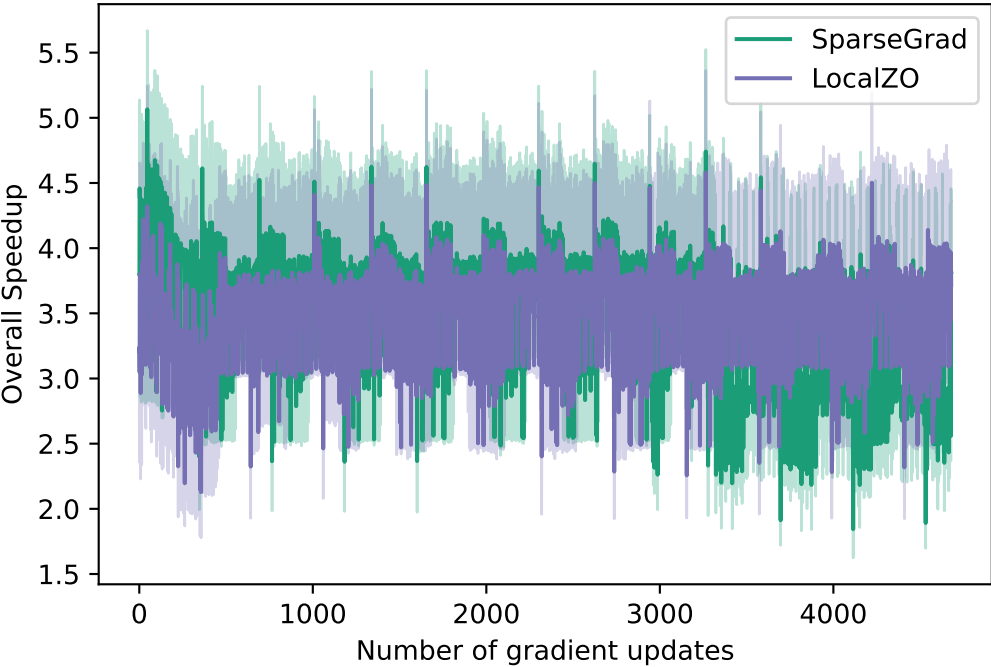

Supplement: supplementary_material [file attachment]

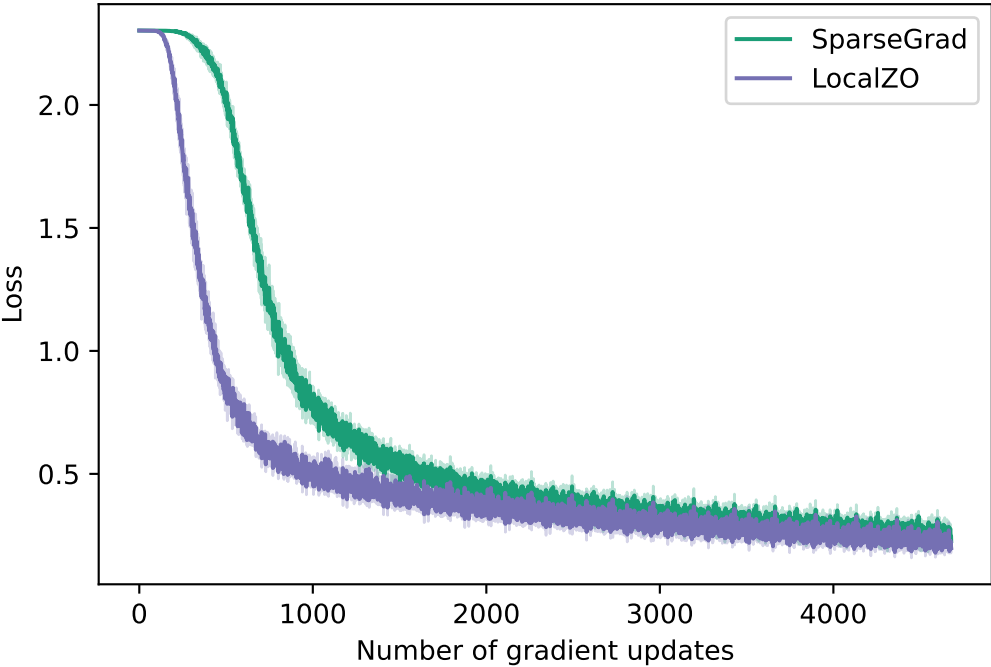

Supplement: supplementary_material [file attachment]

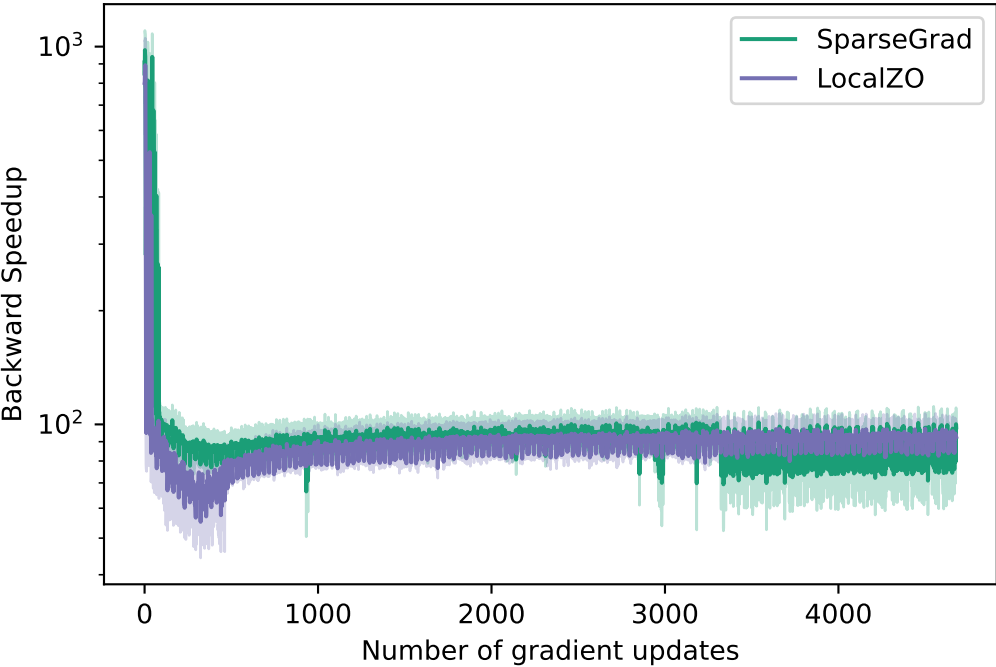

Supplement: supplementary_material [file attachment]

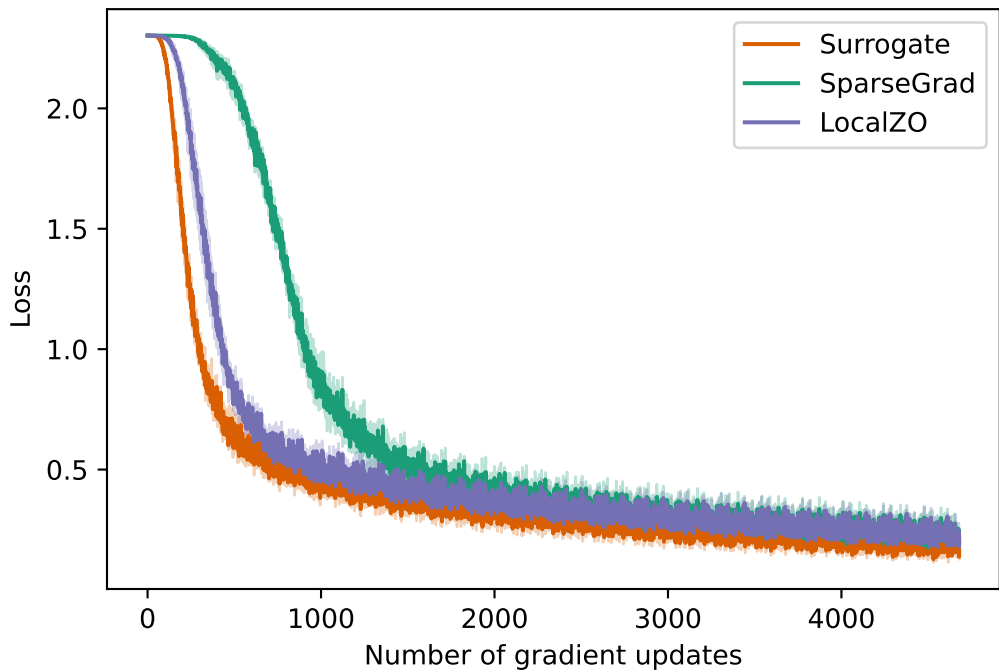

Supplement: supplementary_material [file attachment]

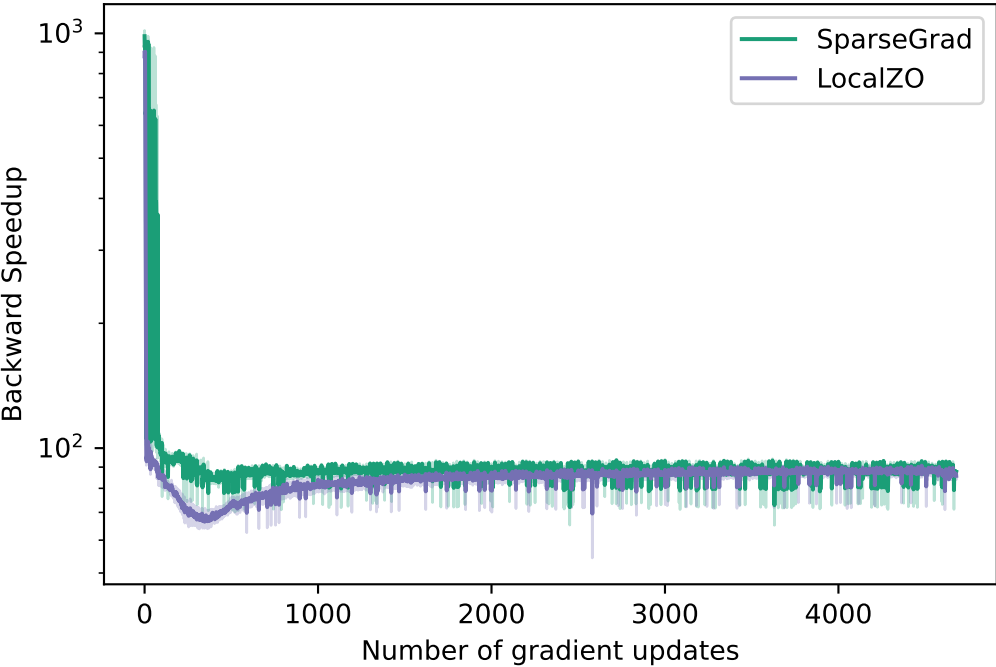

Supplement: supplementary_material [file attachment]

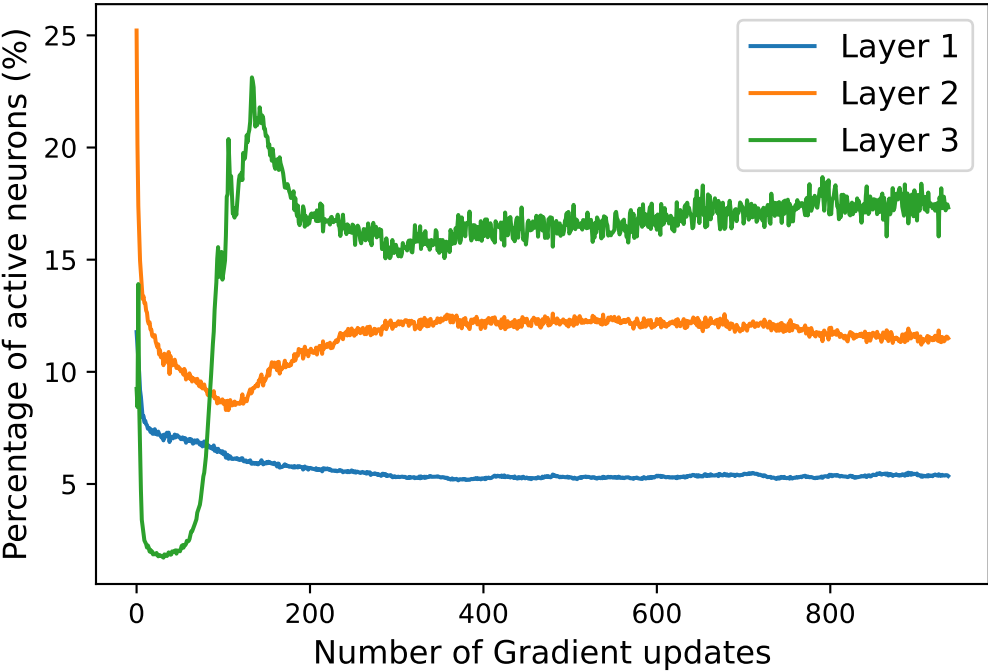

Supplement: supplementary_material [file attachment]

$$z \sim \text{Laplace}(0, \frac{1}{\sqrt{2}})$$

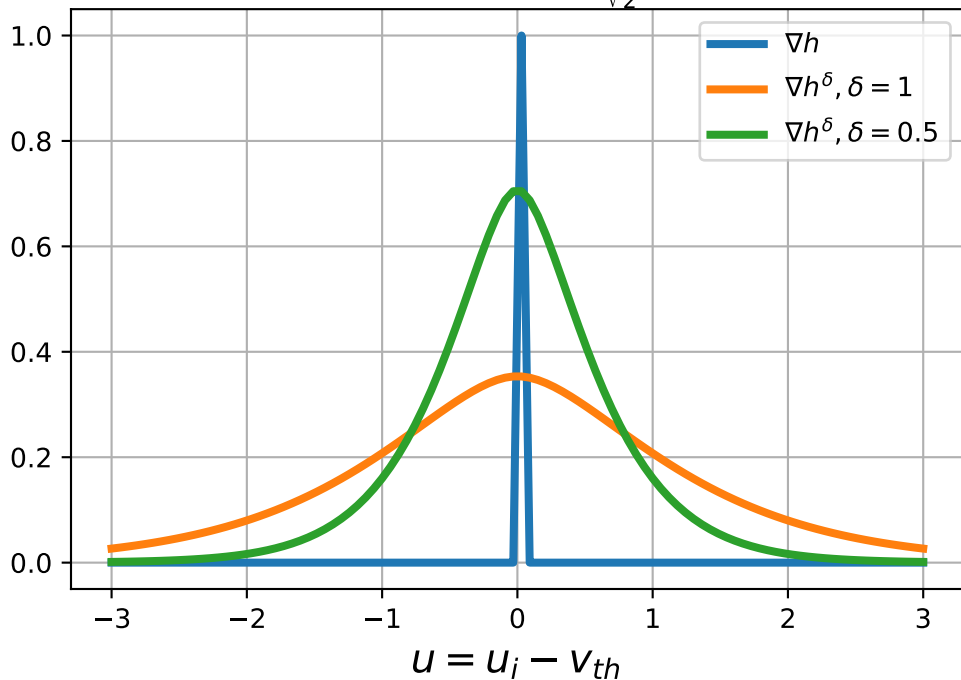

Supplement: supplementary_material [file attachment]

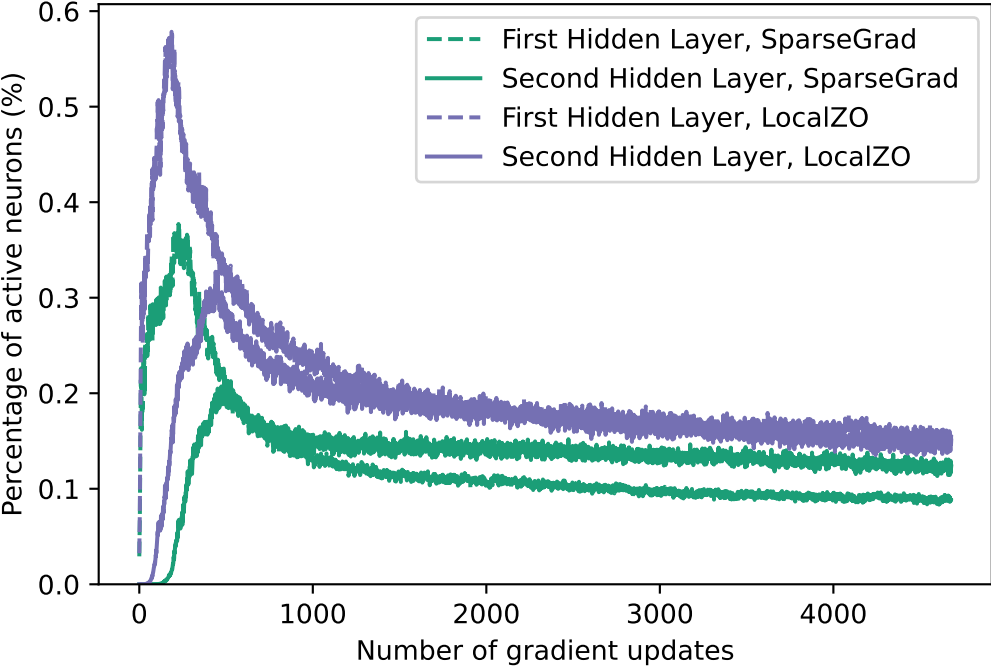

Supplement: supplementary_material [file attachment]

$$z \sim \text{Laplace}(0, \frac{1}{\sqrt{2}})$$

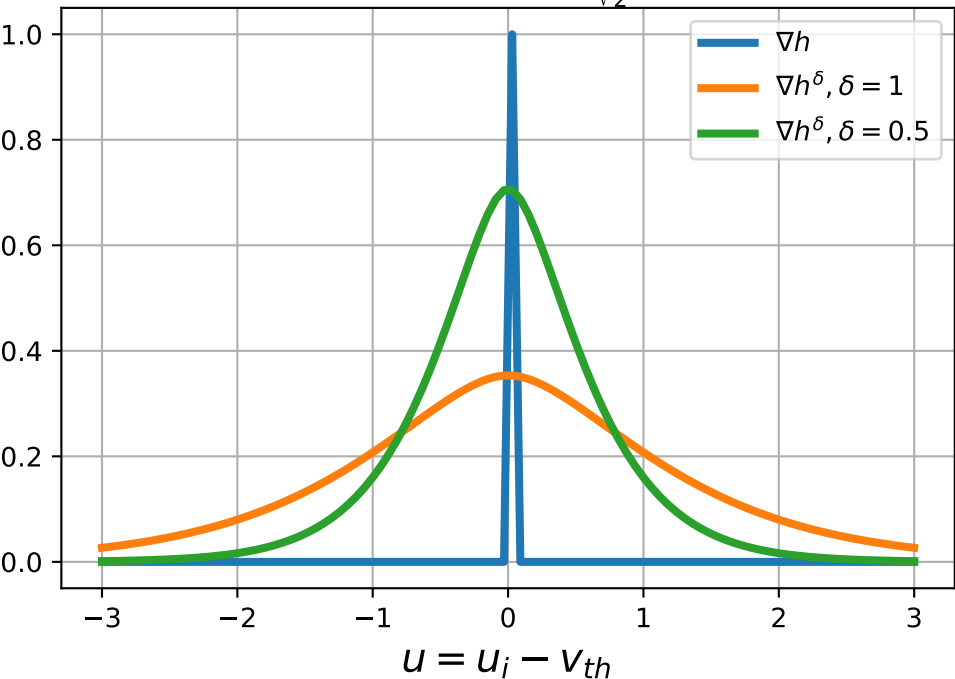

Supplement: supplementary_material [file attachment]

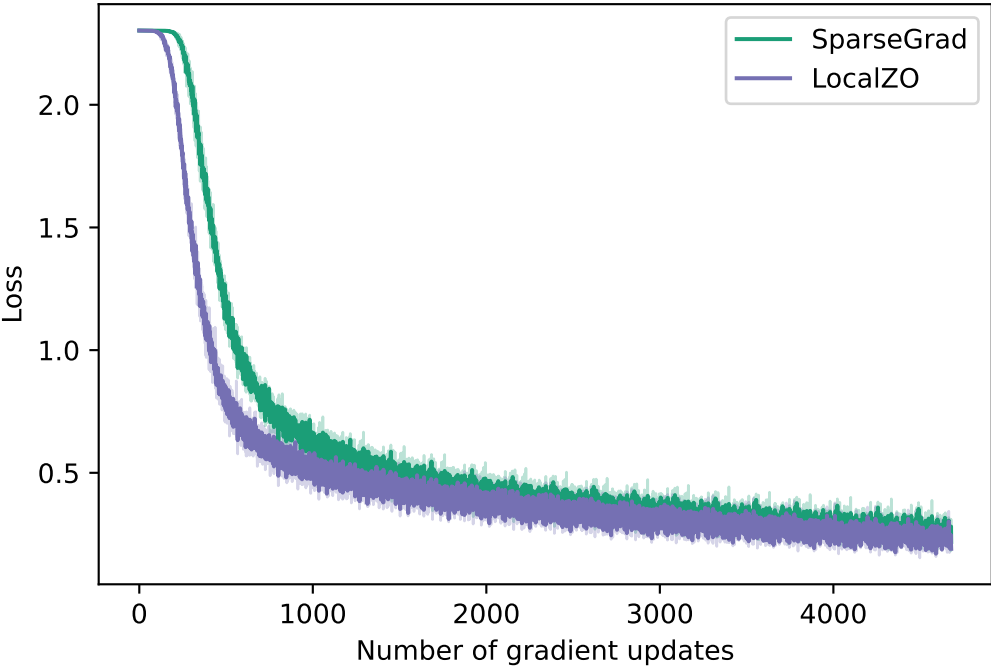

Supplement: supplementary_material [file attachment]

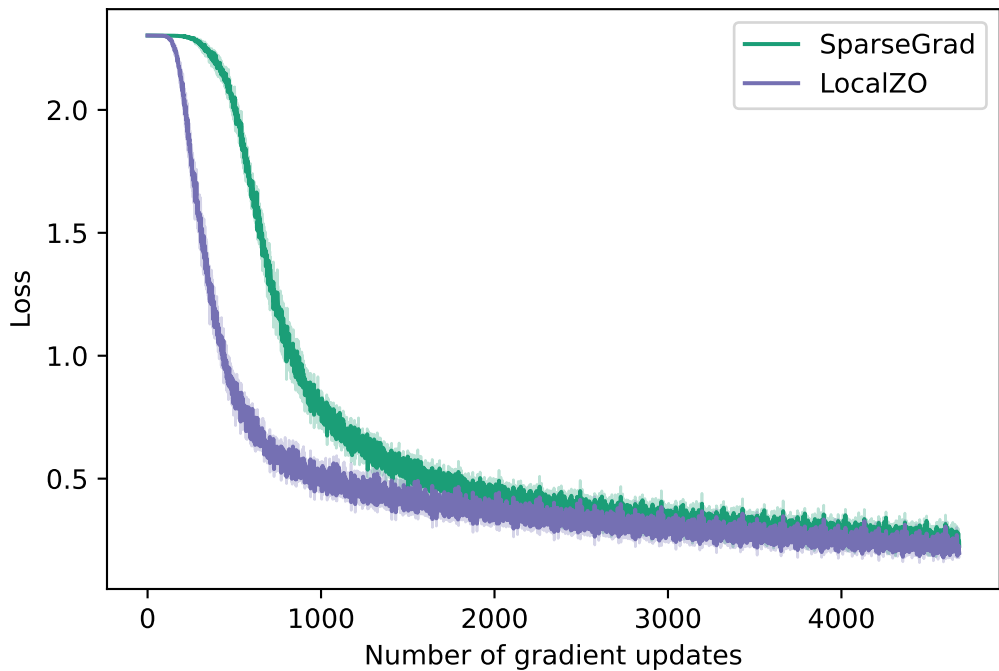

Supplement: supplementary_material [file attachment]

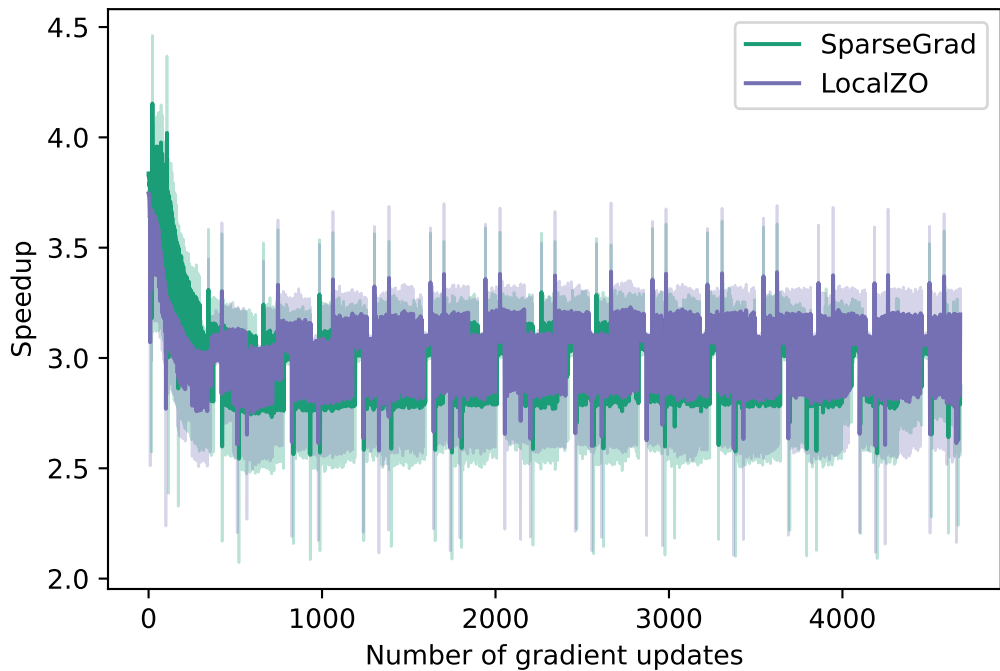

Supplement: supplementary_material [file attachment]

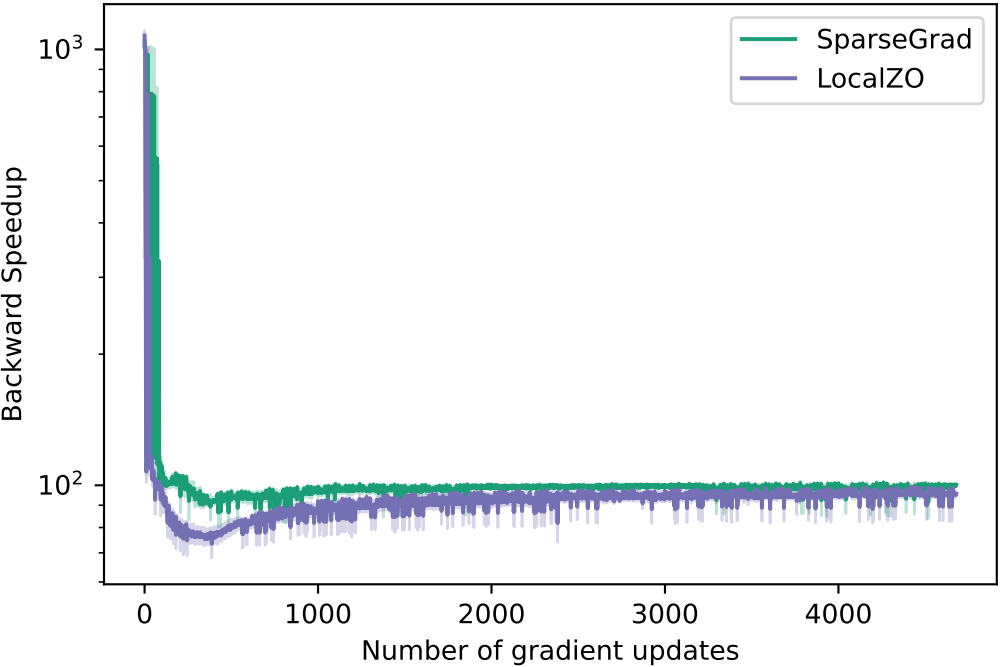

Supplement: supplementary_material [file attachment]

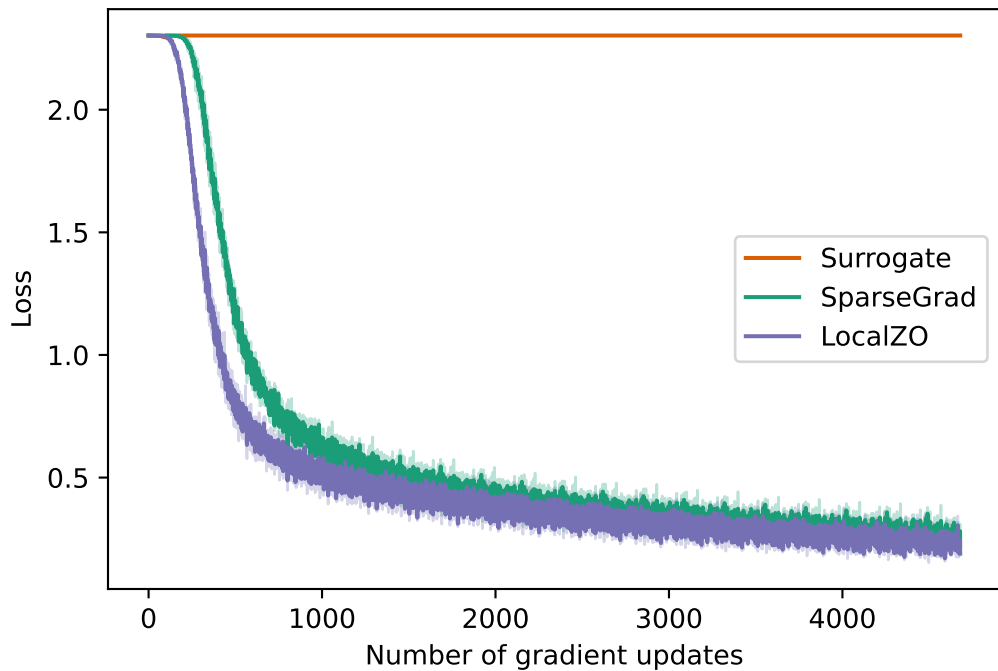

Supplement: supplementary_material [file attachment]

# Spike, t=1

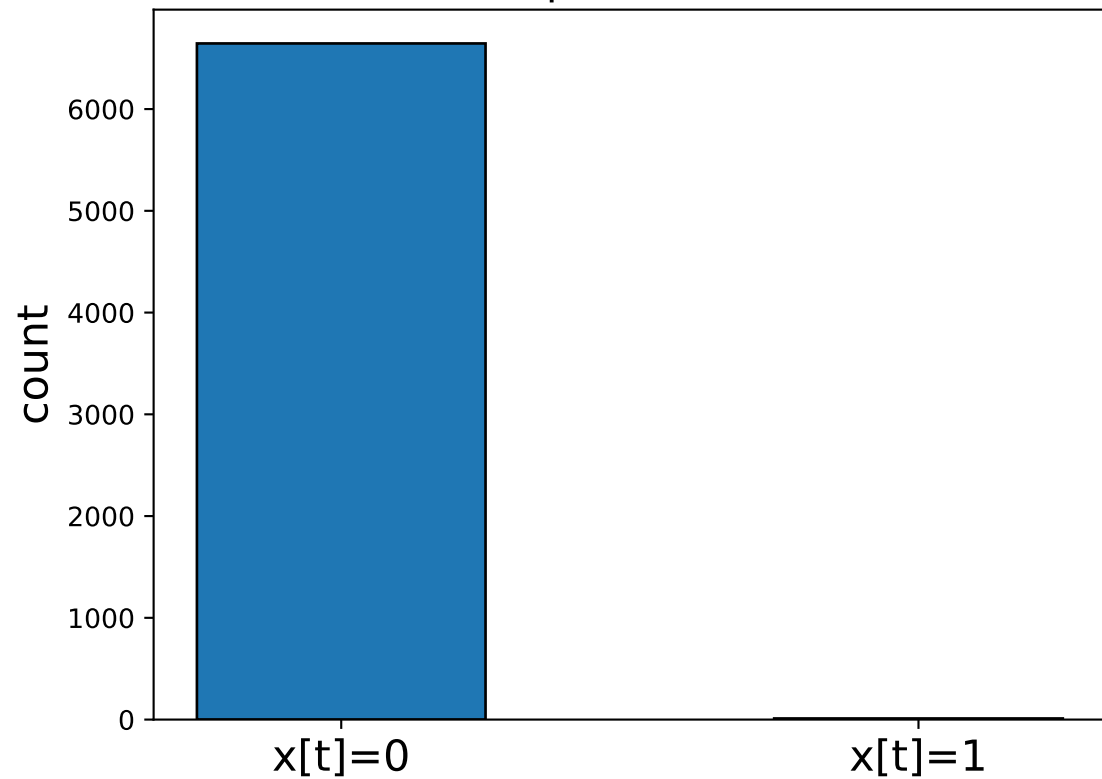

Supplement: supplementary_material [file attachment]

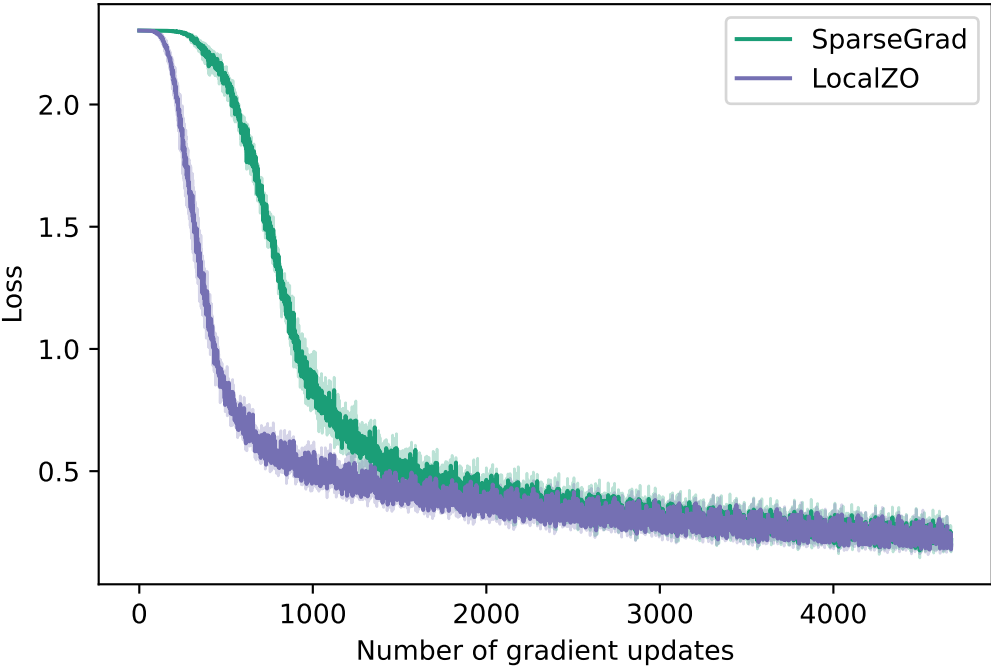

Supplement: supplementary_material [file attachment]

activity of a neuron,  $t=4$

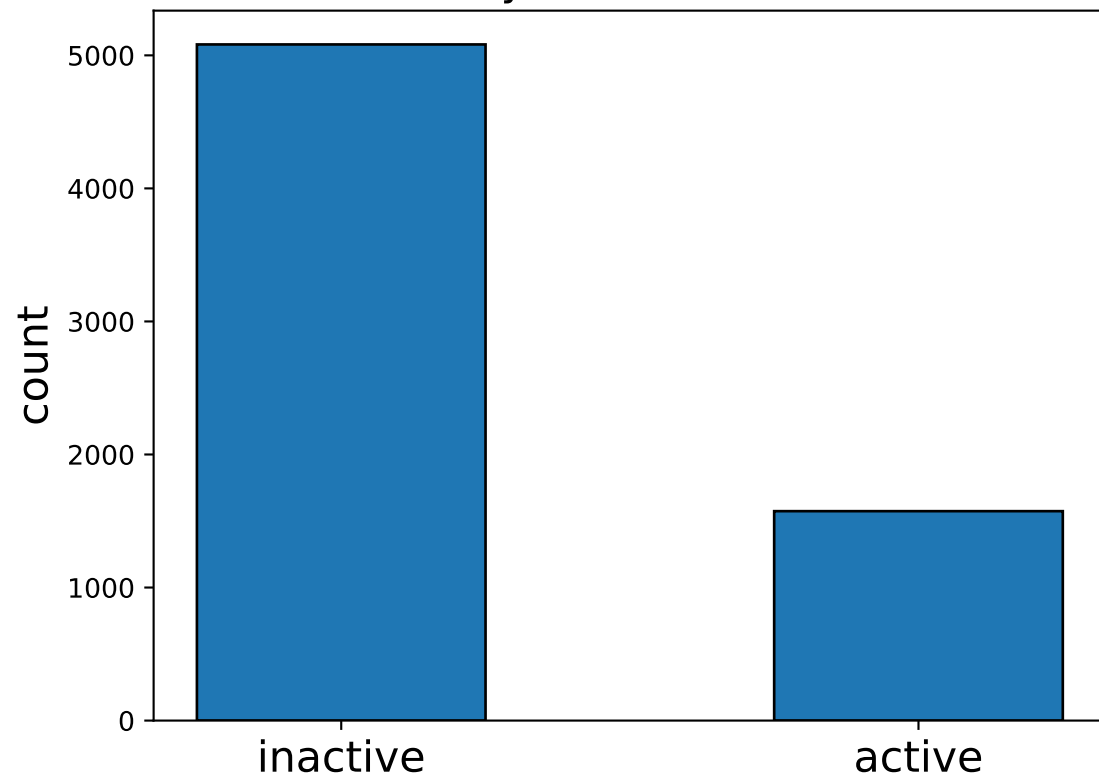

Supplement: supplementary_material [file attachment]

$$z \sim N(0, 1)$$

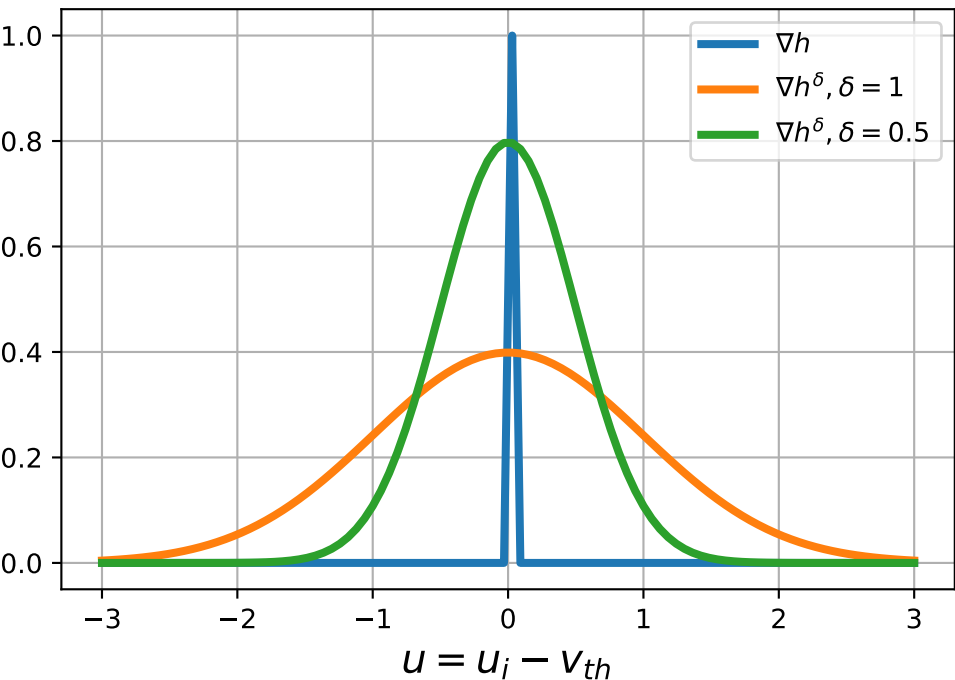

Supplement: supplementary_material [file attachment]

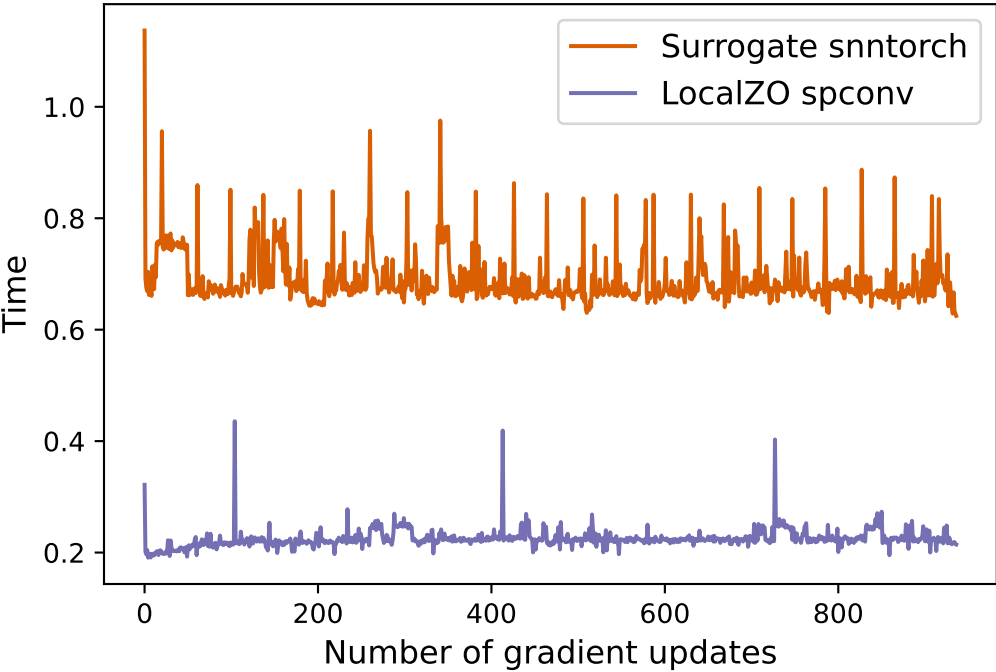

Supplement: supplementary_material [file attachment]

t=2

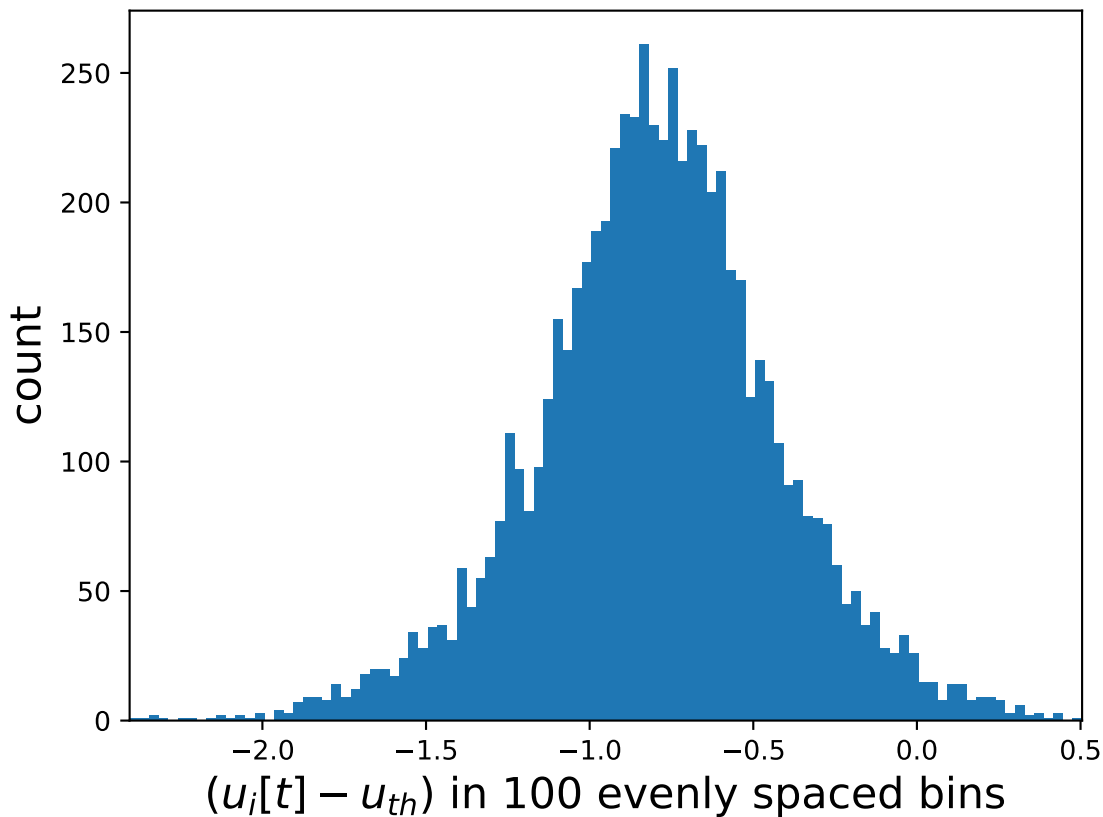

Supplement: supplementary_material [file attachment]

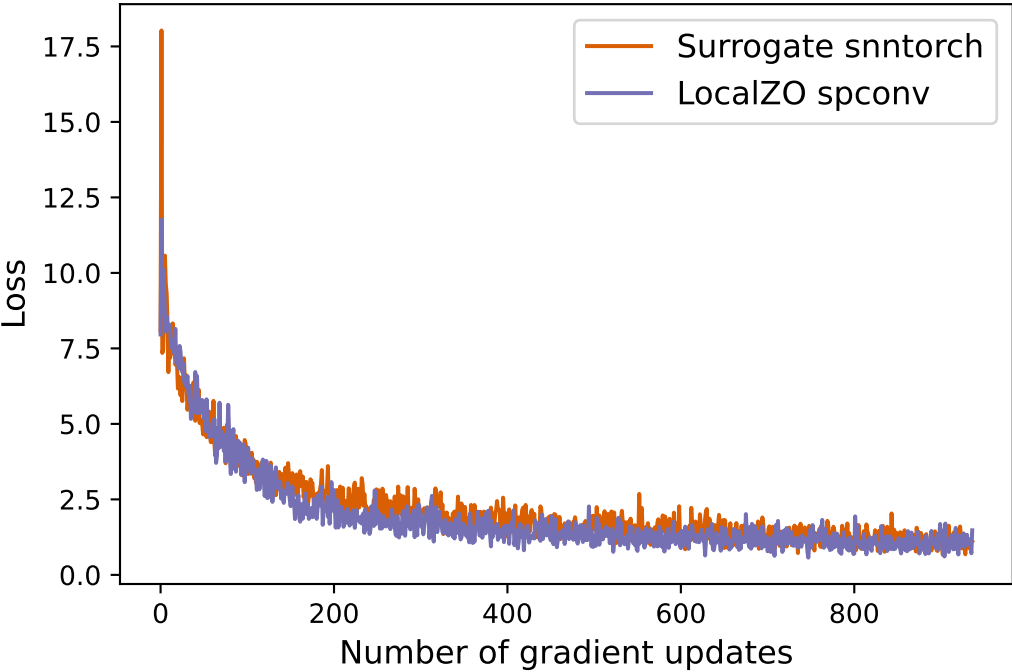

Supplement: supplementary_material [file attachment]
